# Supplementary material for: Association between Airborne Fine Particulate Matter and Residents’ Cardiovascular Diseases, Ischemic Heart Disease and Cerebral Vascular Disease Mortality in Areas with Lighter Air Pollution in China
Source: Int J Environ Res Public Health. 2018 Sep 3;15(9):1918. doi: 10.3390/ijerph15091918 (PMC6164472; doi:10.3390/ijerph15091918)
Supplement: Supplementary file 1 [file ijerph-15-01918-s001.pdf]

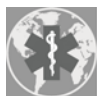

*Supplementary Material*

# **Association between Airborne Fine Particulate Matter and Residents' Cardiovascular Diseases, Ischemic Heart Disease and Cerebral vascular Disease Mortality in Area with Lighter Air Pollution in China**

**Junfang CAI <sup>1,^</sup>, Shuyuan YU <sup>2,^</sup>, Yingxin PEI <sup>3</sup>, Chaoqiong PENG <sup>2</sup>, Yuxue LIAO <sup>2</sup>, Ning LIU <sup>2</sup>, Jia Jia JI <sup>2</sup>, Jinquan CHENG <sup>2,\*</sup>**

## *3.5. Analysis of GAM*

Based on the control of long-term trend, seasonal trend, effect of DOW, effect of PH of residents' mortality, and daily average temperature and daily average RH, single pollutant model (no adjustment of pollutants) was used to calculate the RR value and its 95%CI lag0-lag5, lag01-lag04 of PM<sub>2.5</sub> daily average concentration versus residents' mortality from CVD. The results show positive correlation between PM<sub>2.5</sub> daily average concentration with lag0-lag5, lag01-lag04 and CVD mortality; positive correlation between PM<sub>2.5</sub> daily average concentration with lag0, lag1, lag2, lag5, lag01-lag04 and IHD mortality; positive correlation between PM<sub>2.5</sub> daily average concentration with lag0, lag1, lag3, lag4, lag5, lag01-lag04 and EVD mortality (see Figure S1-1). After controlling CO or O<sub>3</sub> separately, the results of double-pollutant models show positive correlation between PM<sub>2.5</sub> daily average concentration with lag0-lag5, lag01-lag04 and CVD mortality. The results were consistent with no adjustment of CO and O<sub>3</sub>. The effects maintain stability after controlling CO or O<sub>3</sub>. After controlling CO, the results show positive correlation between PM<sub>2.5</sub> daily average concentration with lag0-lag5, lag01-lag04 and IHD mortality; positive correlation between PM<sub>2.5</sub> daily average concentration with lag0, lag1, lag3, lag4, lag5, lag01-lag04 and EVD mortality (see Figure S1-2). After controlling O<sub>3</sub>, the results show positive correlation between PM<sub>2.5</sub> daily average concentration with lag0, lag1, lag2, lag5, lag01-lag04 and IHD mortality; positive correlation between PM<sub>2.5</sub> daily average concentration with lag1, lag3, lag4, lag5, lag01-lag04 and EVD mortality (see Figure S1-3).

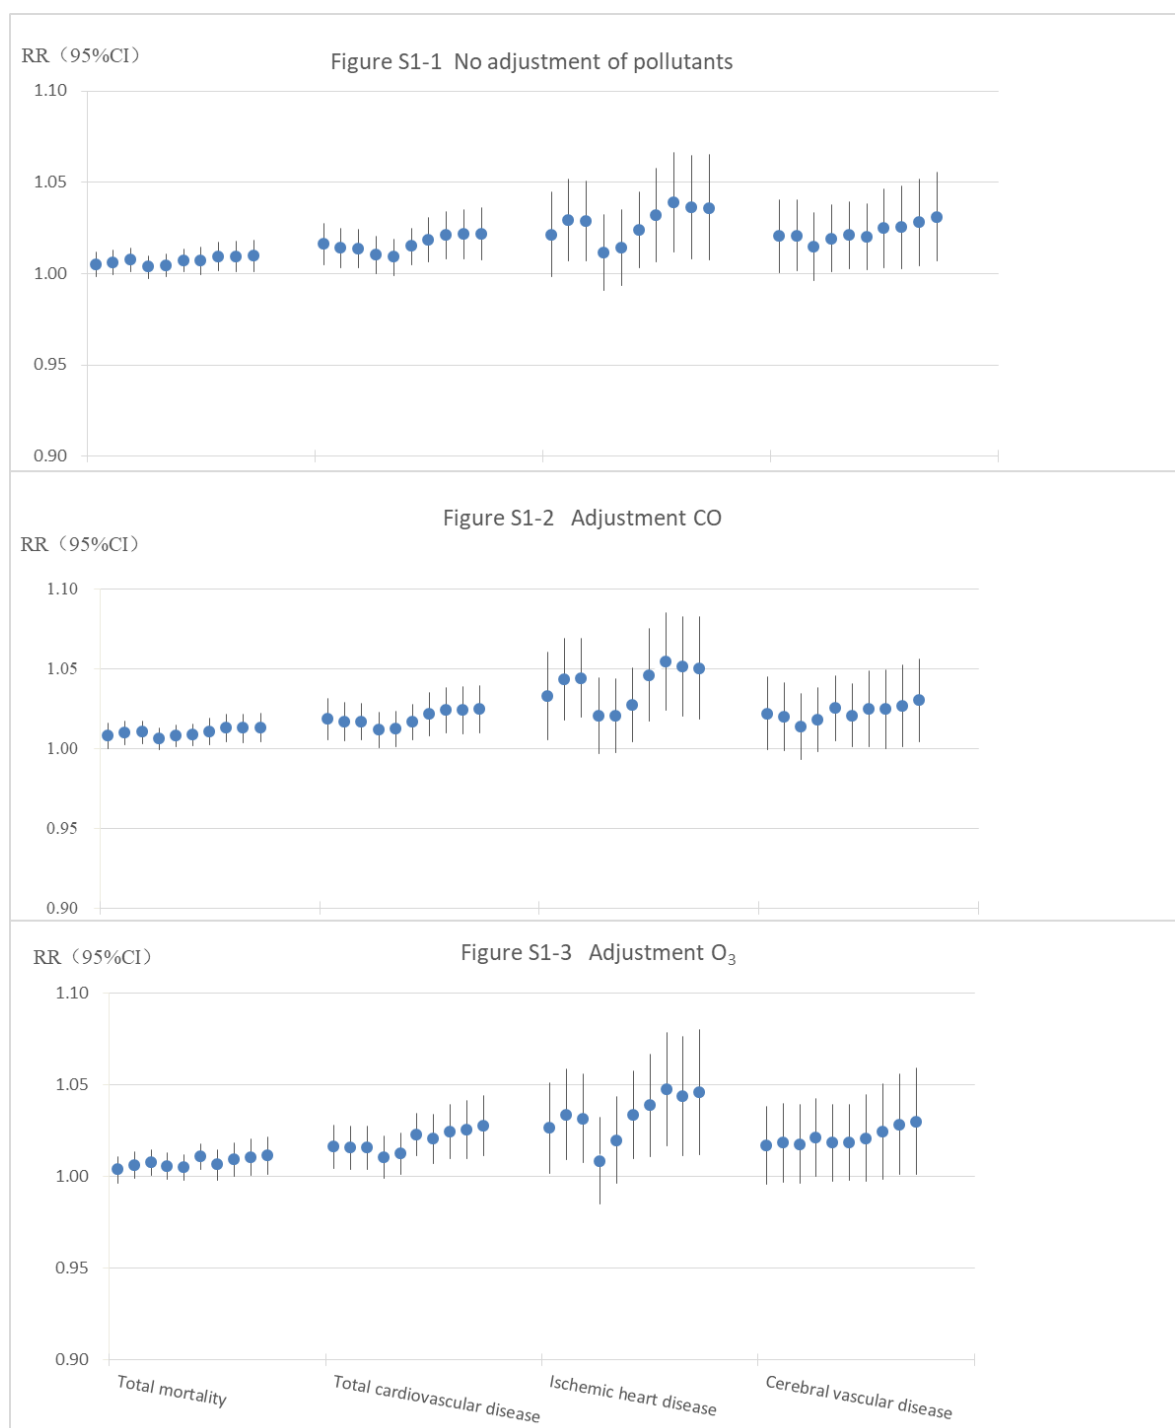

**Figure S1.** RR and 95% CI of mortality per 10 $\mu\text{g}/\text{m}^3$  increase in  $\text{PM}_{2.5}$  concentration with different lags 0–5 days prior to mortality (lag0–lag5) and moving averages from day 0 to day prior to mortality (lag01–lag04).

**Table S1.** People's Republic of China Ministry of Environmental Protection, Atmospheric environmental quality standards (GB3095-2012)

| Pollutant         | Mean Time       | Concentration Limit |                  | Unit              |
|-------------------|-----------------|---------------------|------------------|-------------------|
|                   |                 | grade1 criterion    | grade2 criterion |                   |
| SO <sub>2</sub>   | Annual mean     | 20                  | 60               | μg/m <sup>3</sup> |
|                   | 24-hour average | 50                  | 150              |                   |
|                   | 1-hour average  | 150                 | 500              |                   |
| NO <sub>2</sub>   | Annual mean     | 40                  | 40               | μg/m <sup>3</sup> |
|                   | 24-hour average | 80                  | 80               |                   |
|                   | 1-hour average  | 200                 | 200              |                   |
| CO                | 24-hour average | 4000                | 4000             | μg/m <sup>3</sup> |
|                   | 1-hour average  | 10000               | 10000            |                   |
| O <sub>3</sub>    | 8-hour average  | 100                 | 160              | μg/m <sup>3</sup> |
|                   | 1-hour average  | 160                 | 200              |                   |
| PM <sub>10</sub>  | Annual mean     | 40                  | 70               | μg/m <sup>3</sup> |
|                   | 24-hour average | 50                  | 150              |                   |
| PM <sub>2.5</sub> | Annual mean     | 15                  | 35               | μg/m <sup>3</sup> |
|                   | 24-hour average | 35                  | 75               |                   |

According to < People's Republic of China Ministry of Environmental Protection, Atmospheric environmental quality standards (GB3095-2012) >, Natural reserves, scenic spots and other areas requiring special protection apply grade1 criterion. Residential areas, mixed residential areas for commercial transportation, cultural areas, industrial areas and rural areas apply grade2 criterion.
